# Supplementary figures and images for: Sex-Specific Cross Tissue Meta-Analysis Identifies Immune Dysregulation in Women with Alzheimer's Disease
Source: Research Square preprint supplement (doi:10.21203/rs.3.rs-88940/v1), 2020-10-13

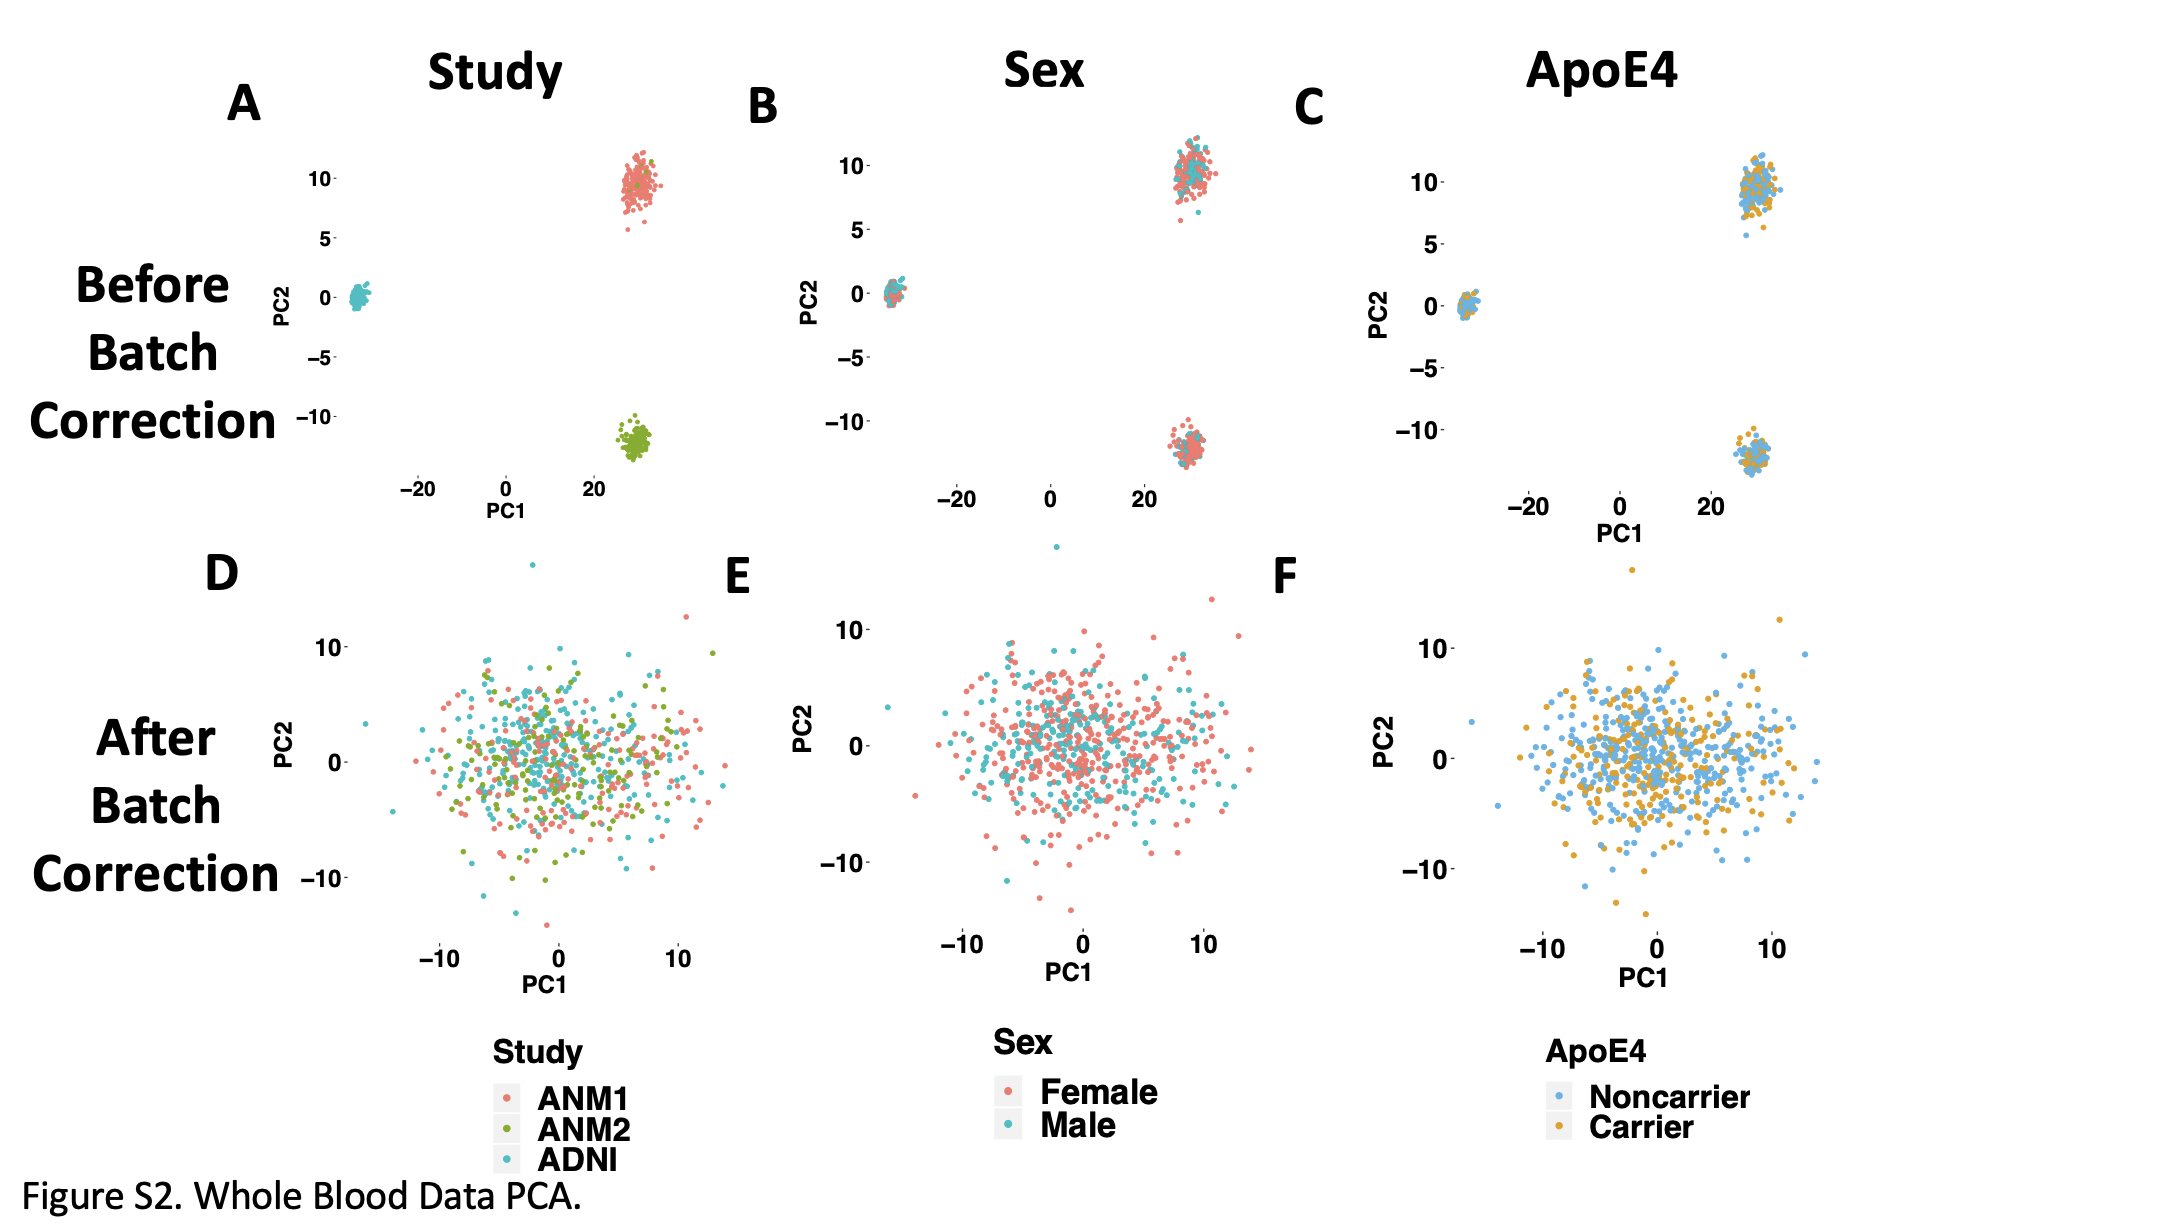

Supplement: Supplementary file 1 [file 3ef495825cb26b1d09a07d22.docx]

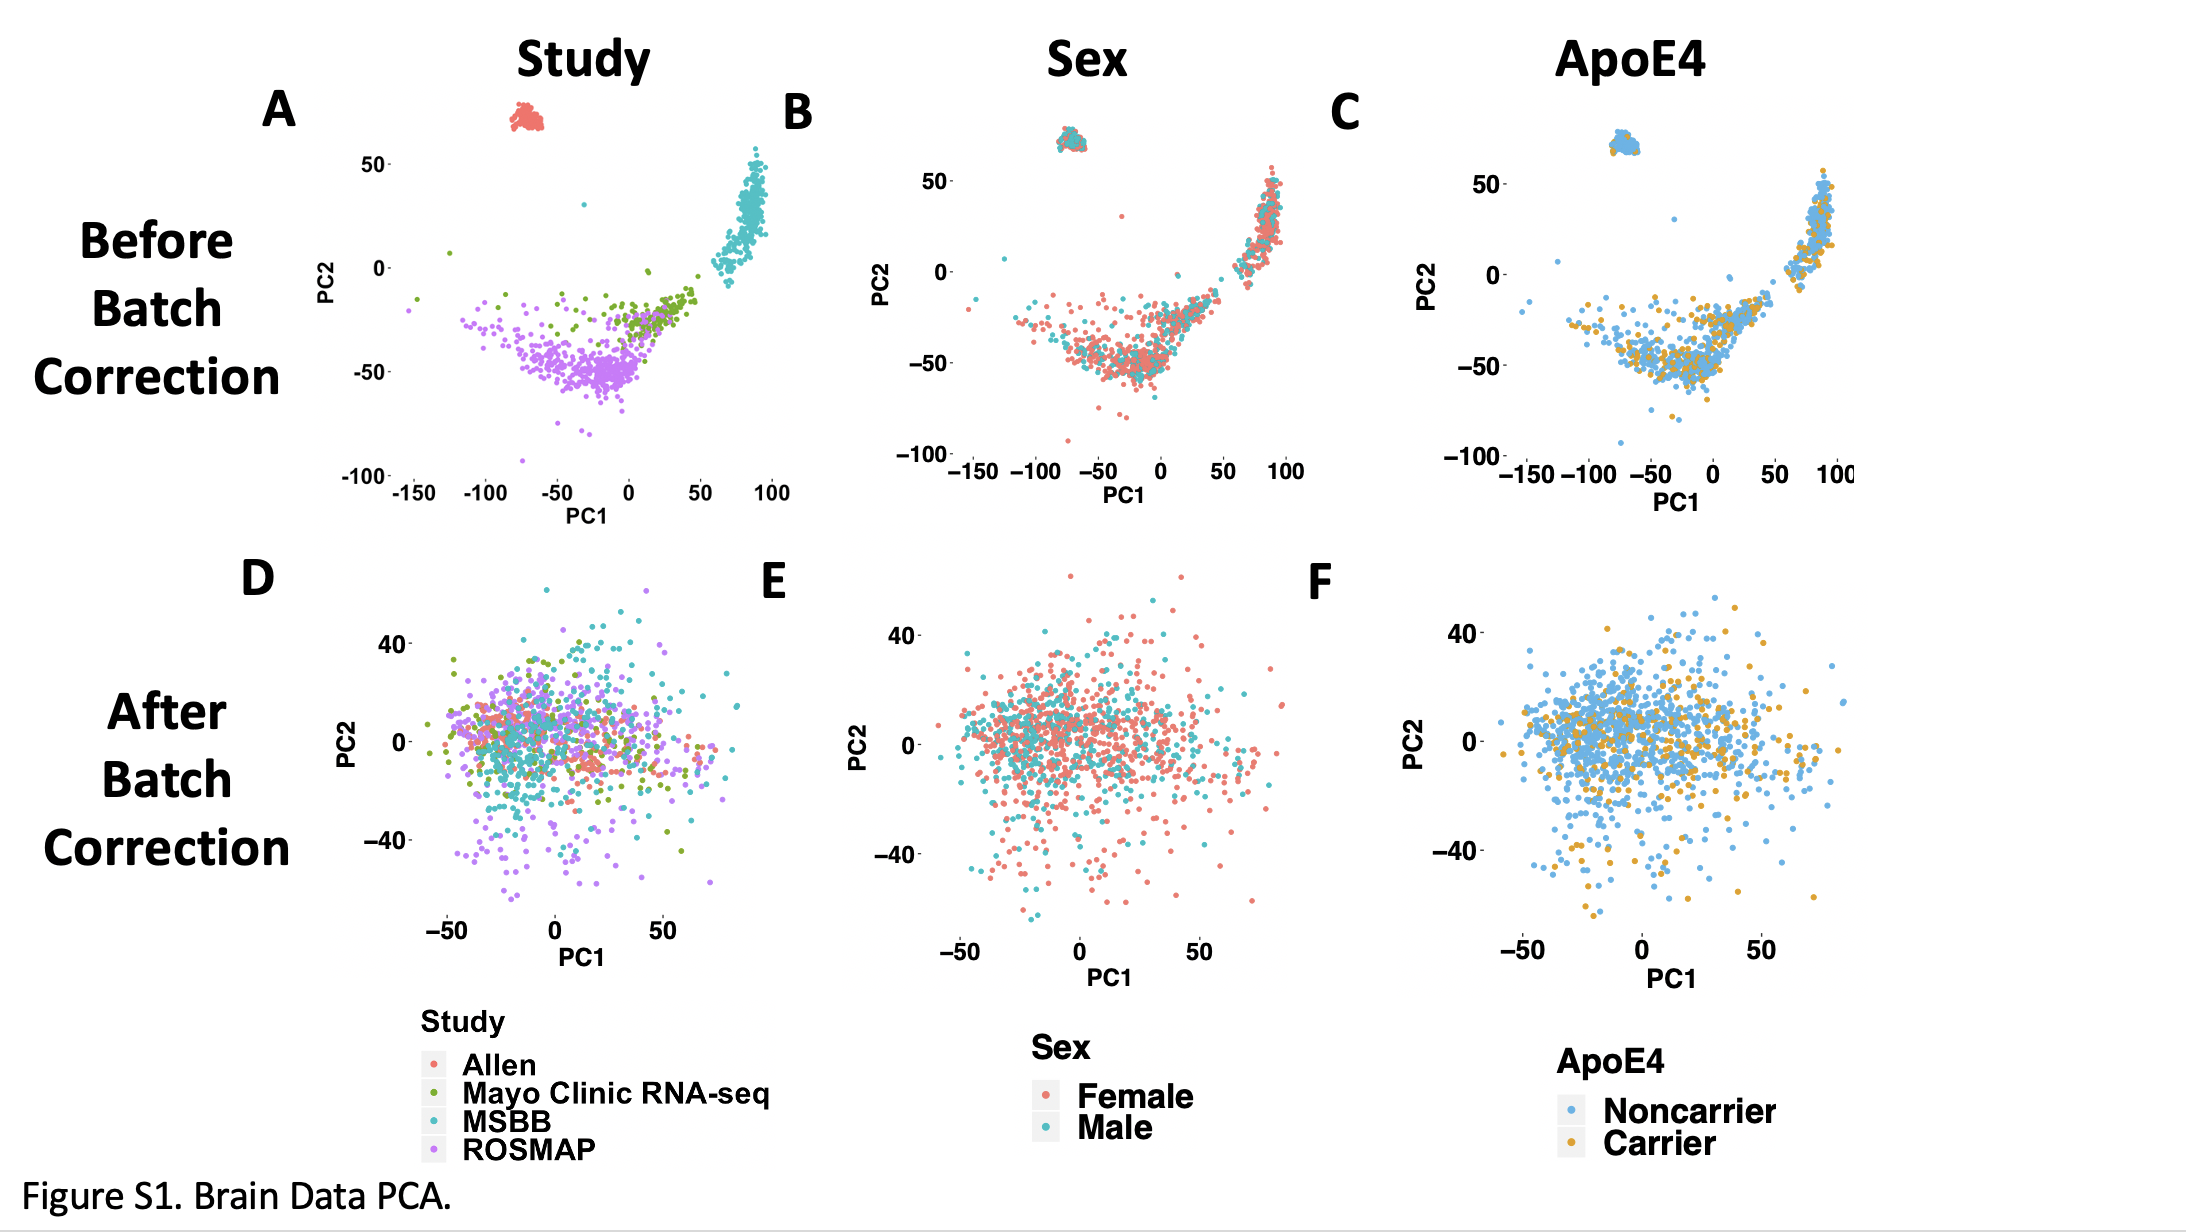

Supplement: Supplementary file 2 [file 8906be783ab2e8b47e4ecdbd.docx]
